# Supplementary figures and images for: A novel mode of capping protein-regulation by twinfilin
Source: eLife journal article supplement (doi:10.7554/elife.41313), 2018-10-23

Figure 5 – figure supplement 2

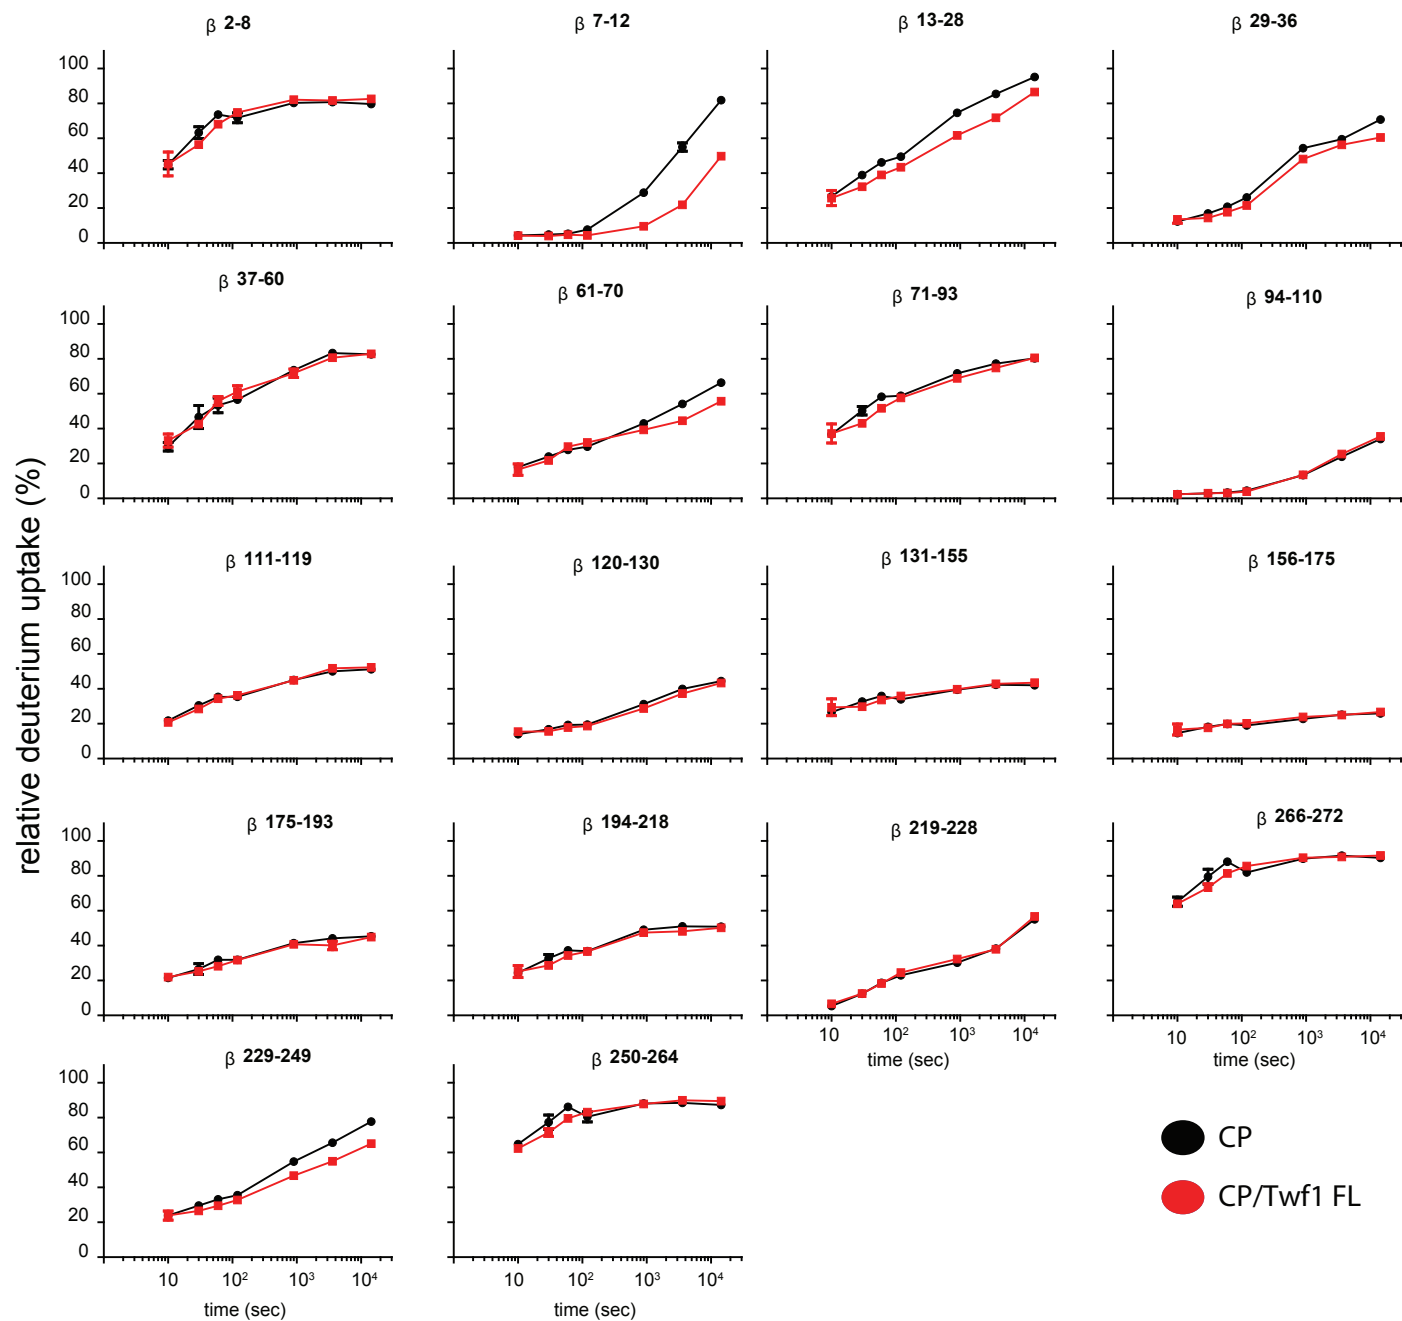

Supplement: supp [file elife-41313-supp-v1.zip]

Figure 7 – figure supplement 1

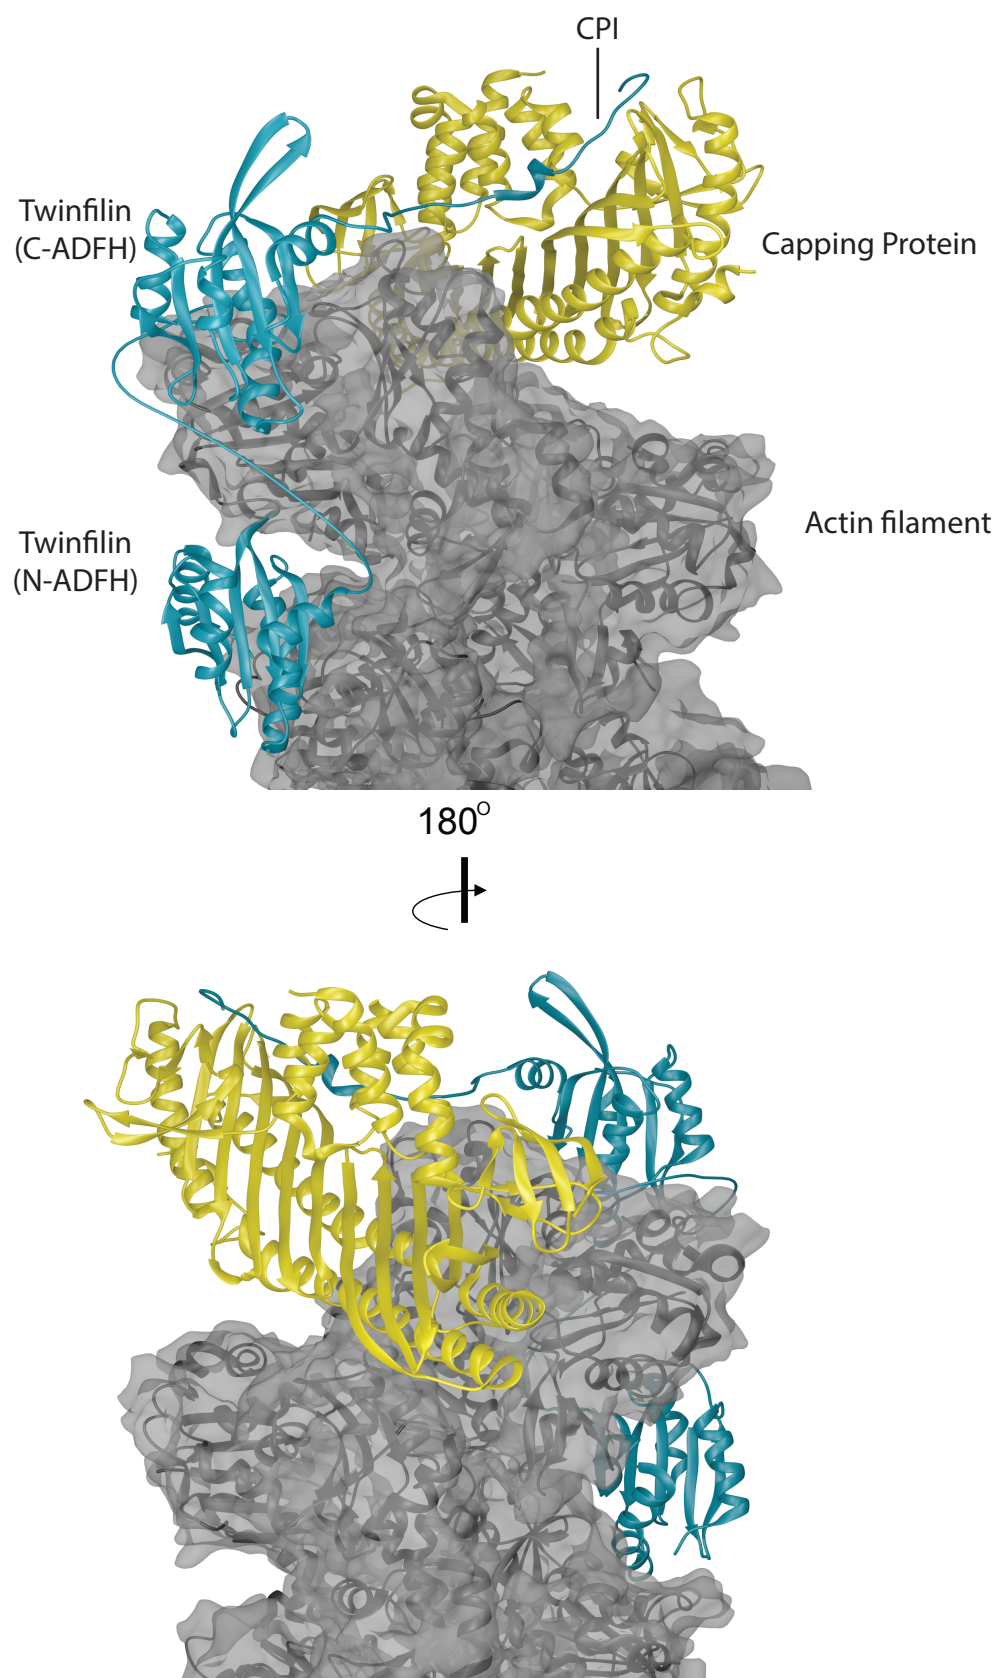

Supplement: supp [file elife-41313-supp-v1.zip]

Figure 6 – figure supplement 1

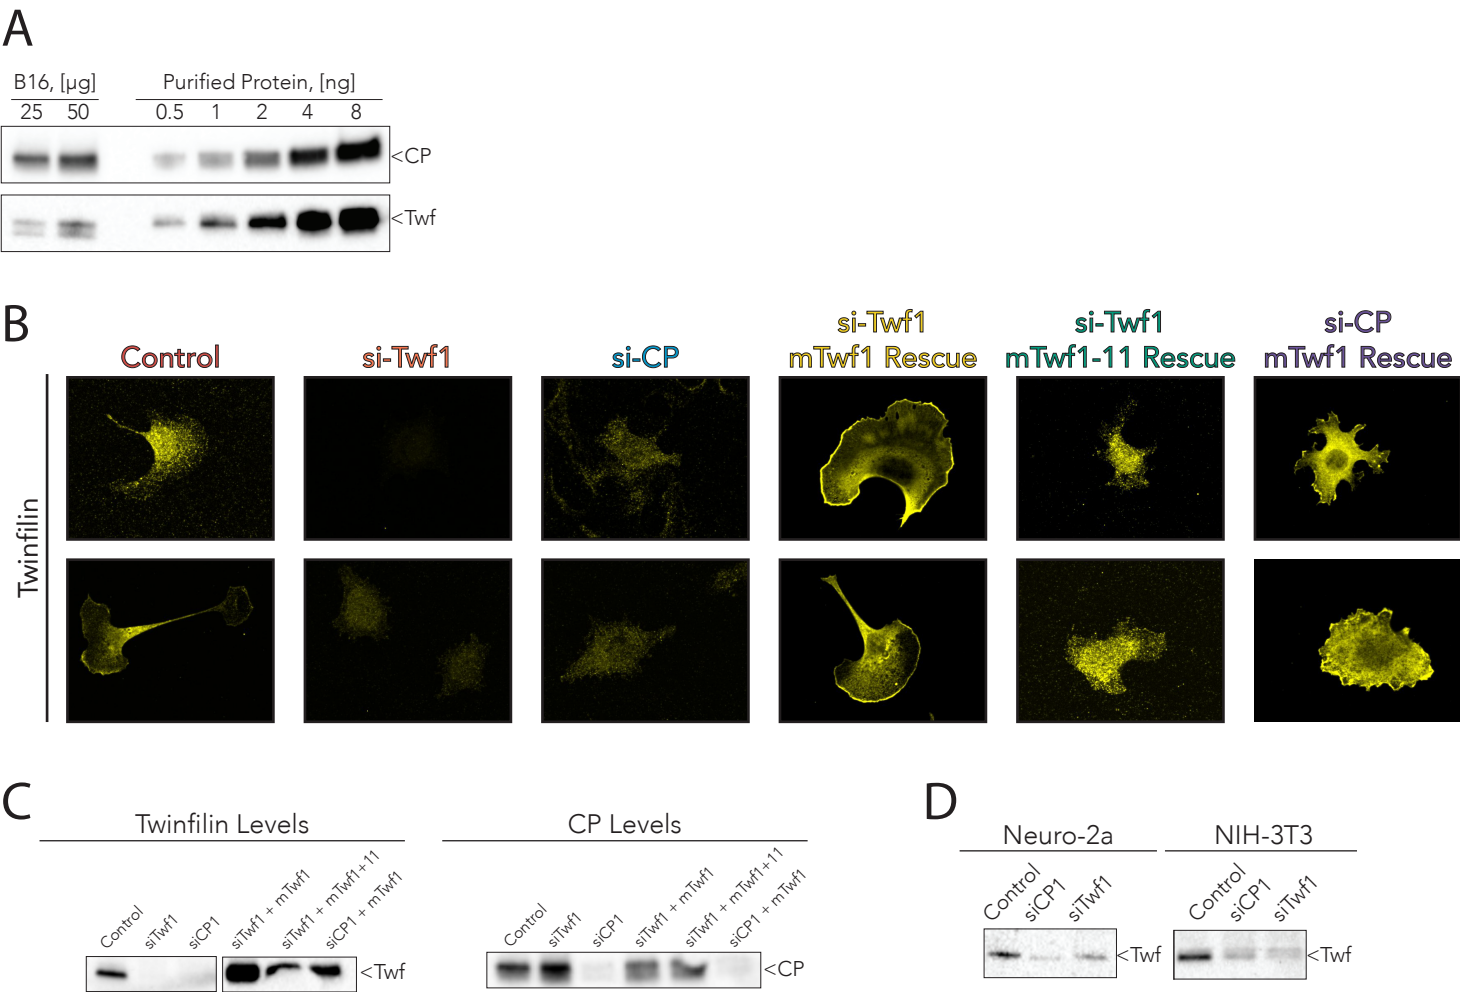

Supplement: supp [file elife-41313-supp-v1.zip]

Figure 5 – figure supplement 1

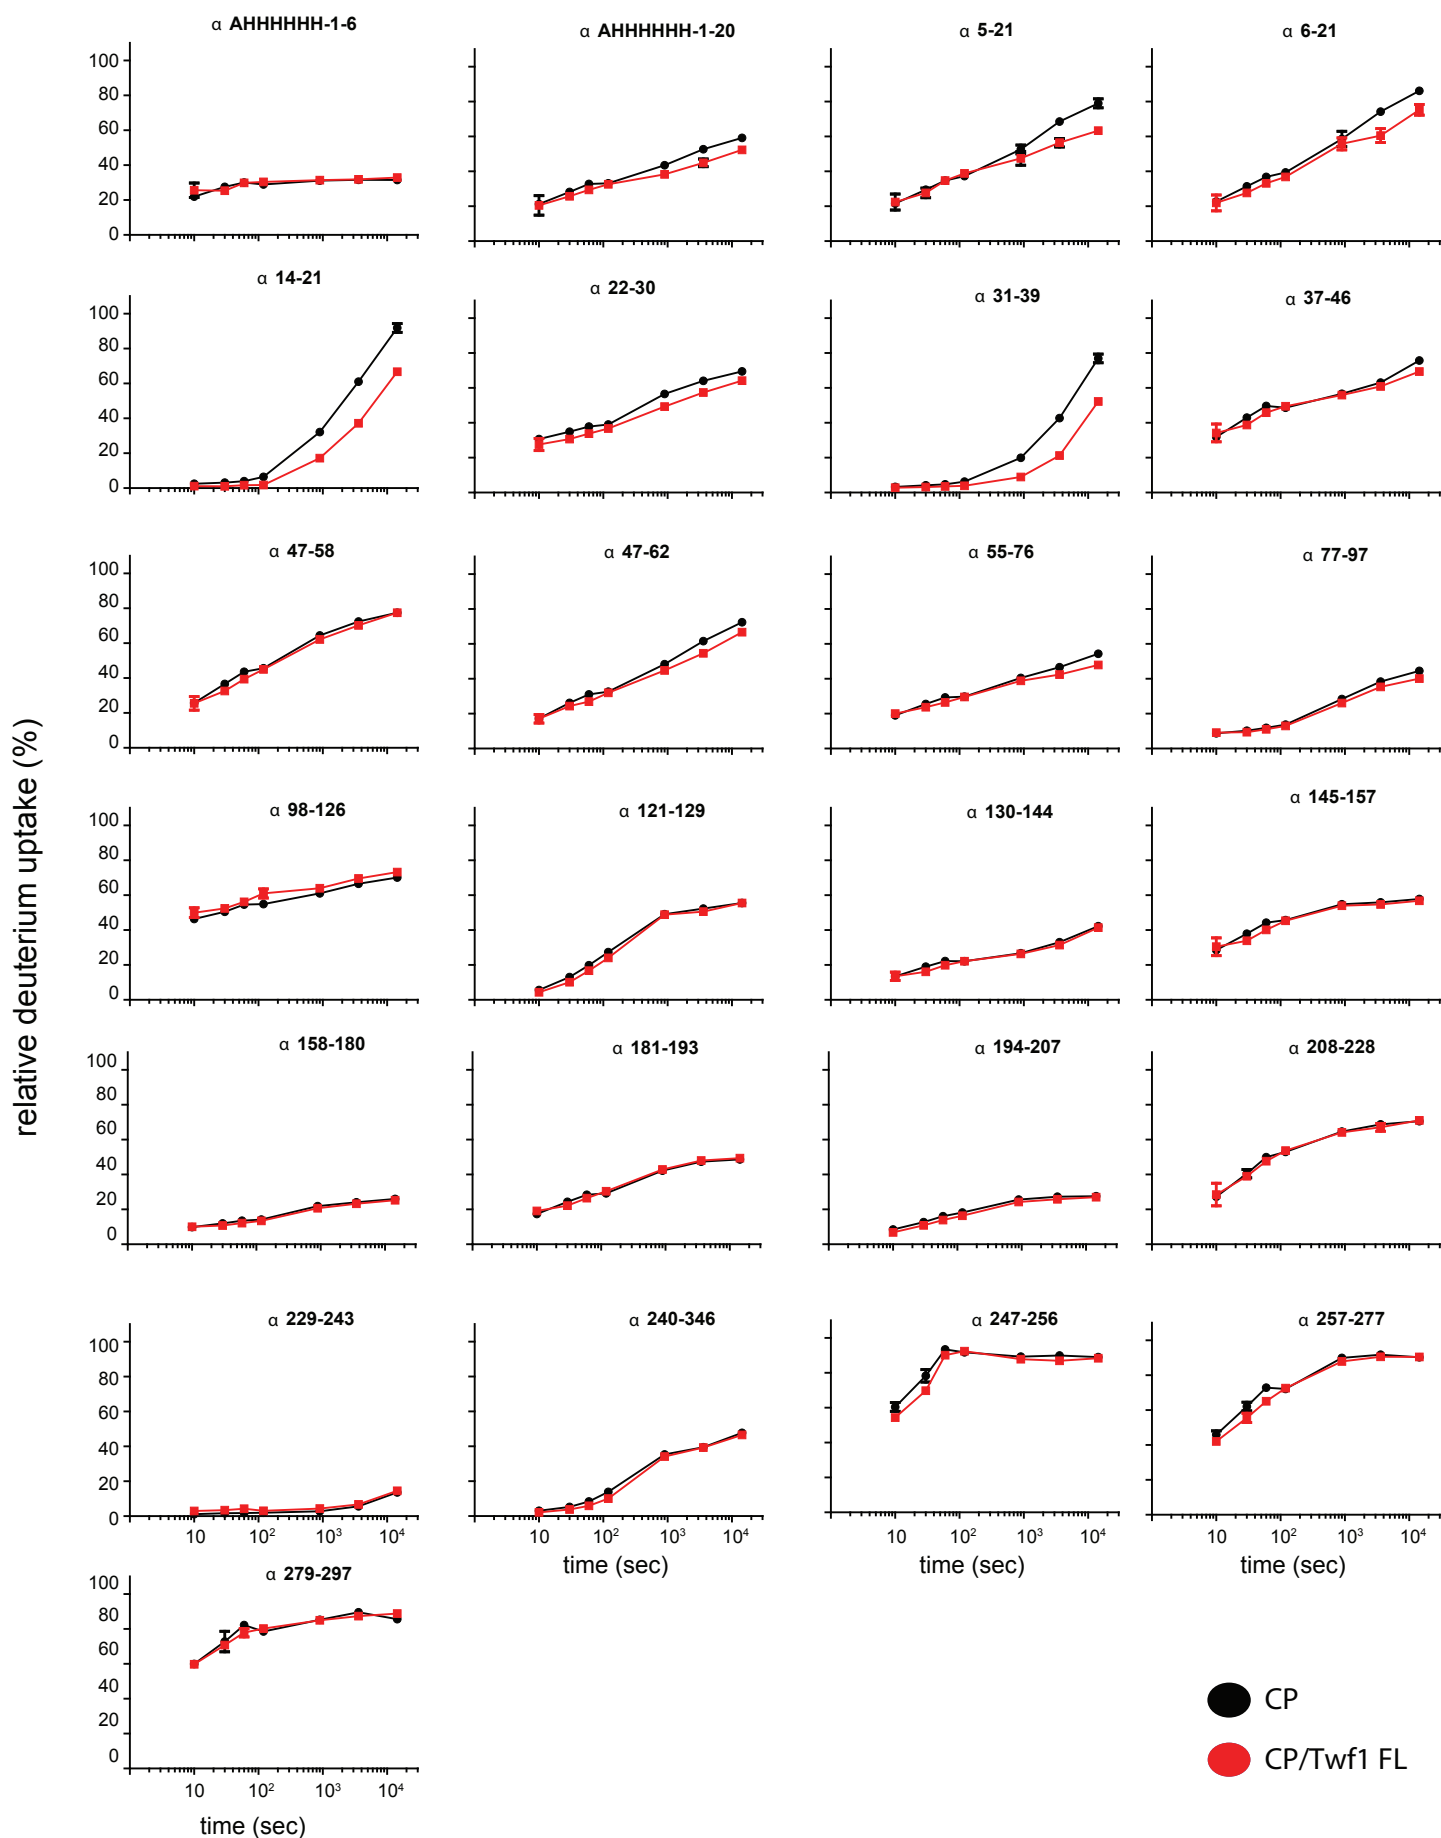

Supplement: supp [file elife-41313-supp-v1.zip]

Figure 3– figure supplement 1

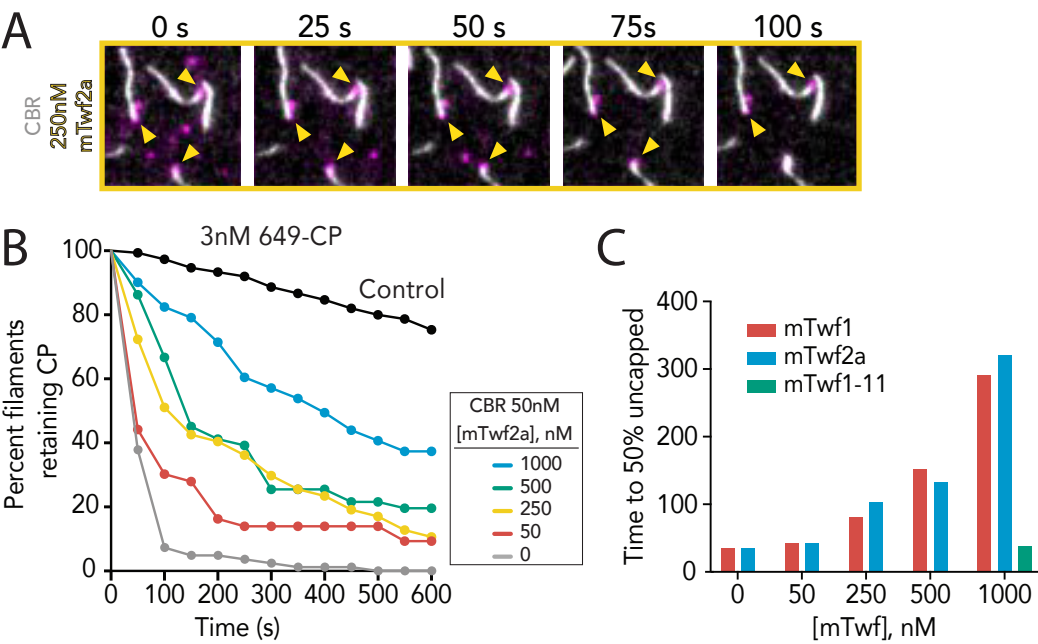

Supplement: supp [file elife-41313-supp-v1.zip]
